# Supplementary material
Source: PubMed Central journal article supplement (PMC4854795)
Supplement: NIHMS772651-supplement-Supplemental_Materials.pdf [file NIHMS772651-supplement-Supplemental_Materials.pdf]

**eTable 1. Dopamine replacement therapy use by medication class**

|                              | <b>LD</b> | <b>DA</b> | <b>Amantadine</b> | <b>MAO-B inhibitor</b> |
|------------------------------|-----------|-----------|-------------------|------------------------|
| 1 year<br>(n, % of treated)  | 70 (38.3) | 68 (37.2) | 19 (10.4)         | 56 (30.6)              |
| 2 years<br>(n, % of treated) | 84 (44.7) | 76 (40.4) | 22 (11.7)         | 54 (28.7)              |
| 3 years<br>(n, % of treated) | 53 (62.4) | 36 (42.4) | 14 (16.5)         | 20 (23.5)              |

LD, levodopa; DA, dopamine agonist; MAO-B, monoamine-oxidase B.
